# Supplementary material
Source: PubMed Central journal article supplement (PMC3056544)
Supplement: NIHMS250129-supplement-1.pdf [file NIHMS250129-supplement-1.pdf]

## Supplemental Figure 1

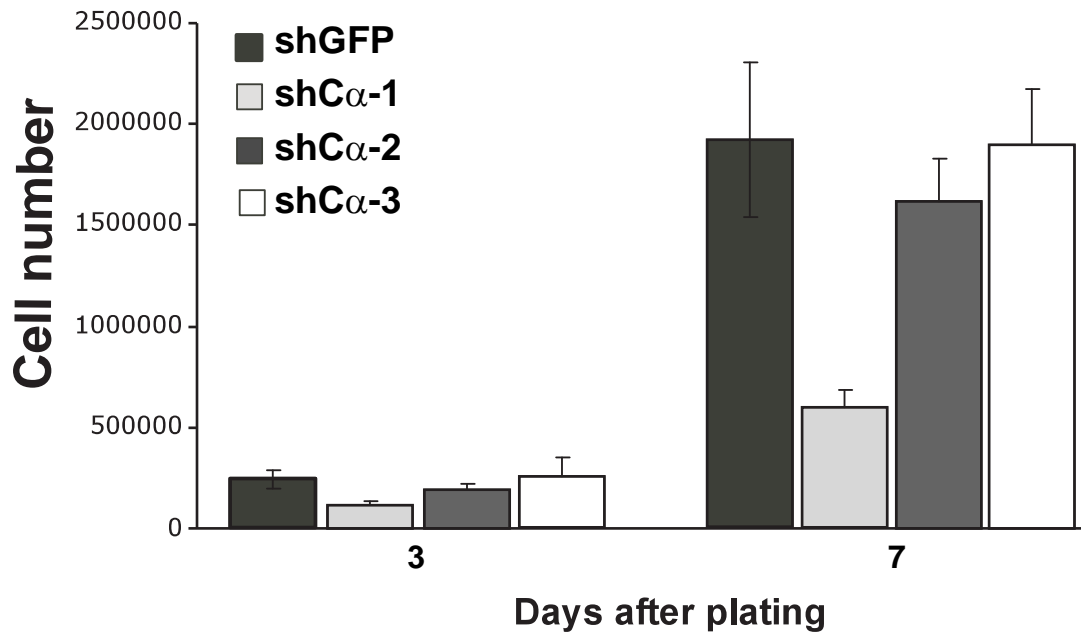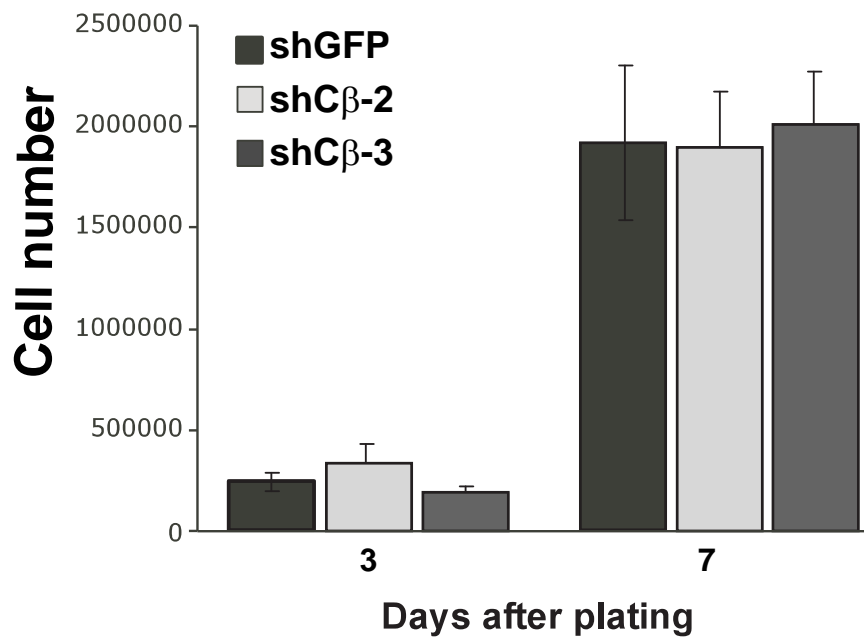

**Supplemental Figure 1. Effect of PP2A C $\alpha$  and C $\beta$  suppression on cell proliferation.** Proliferation of HEK TER cells expressing shGFP or different shRNAs targeting PP2A C $\alpha$  and C $\beta$ .

**Primers used to assess expression of PP2A regulatory subunits**

| <b>Gene Name</b> | <b>Primer #</b> | <b>Sequences</b>          |
|------------------|-----------------|---------------------------|
| B55 $\alpha$     | SV019           | TCTGCCCGCCCCCTCCTTCCTTTTC |
|                  | SV020           | CTGCTGGGTTCCTCGGGGTCTCC   |
| B55 $\beta$      | SV021           | CCGCCGCAGCCTCGCAGAAC      |
|                  | SV022           | GGGAACCAGAAGCCGGCAGACAAG  |
| B55 $\gamma$     | SV023           | TGCCACCCCTCTGAGTCGTCTTT   |
|                  | SV024           | GCTGGGTCTGTTTCCTGGGTATG   |
| B56 $\alpha$     | SV025           | CCCGTGCCCCCGCCTCAG        |
|                  | SV026           | GCCCGCCAACGCCTCACG        |
| B56 $\beta$      | SV027           | ATCCGGGGGCTGCTCAAATACTGG  |
|                  | SV028           | AGCCCGCTCTGCAACCTGGAAATG  |
| B56 $\delta$     | SV029           | GCTGCCCGAGTCCTCCCCATCAT   |
|                  | SV030           | AACCGGCCCTTCTGCTTCTCTGC   |
| B56 $\epsilon$   | SV031           | GTATCTAGCCCCCATTTTCAGGTG  |
|                  | SV032           | ATAGCCGGATTCCAATGTTCTTT   |
| B56 $\gamma$     | SV033           | TCAAATACTGGCCAAAGACTCACA  |
|                  | SV034           | TGCGGTACAAGGAAGGAAACA     |
| PR48             | SV035           | CGCGGCCAAGTTCGTCCATCT     |
|                  | SV036           | CAGCCCCGGGTGCGTGTTTC      |
| PR72/PR130       | SV039           | TTGCGAAGGGTAAAAACTCTAAT   |
|                  | SV040           | GGGCTCGATCCTCTTCCTCTAT    |
| PR93             | SV041           | ACGGTCTCAGCGGGTAAGGTC     |
|                  | SV042           | TCACTGTCATCGGCATTTTCTAAG  |
| PR110            | SV043           | ACAGCCCCAGCCAAAAGAGCACT   |
|                  | SV044           | ATAGGGGTCGATGTTGGGATTAG   |
| PTPA             | SV045           | AGCCGGCAGCCAGGGAGTGTG     |
|                  | SV046           | AGGAAGGGACGGCGCTGATGTT    |

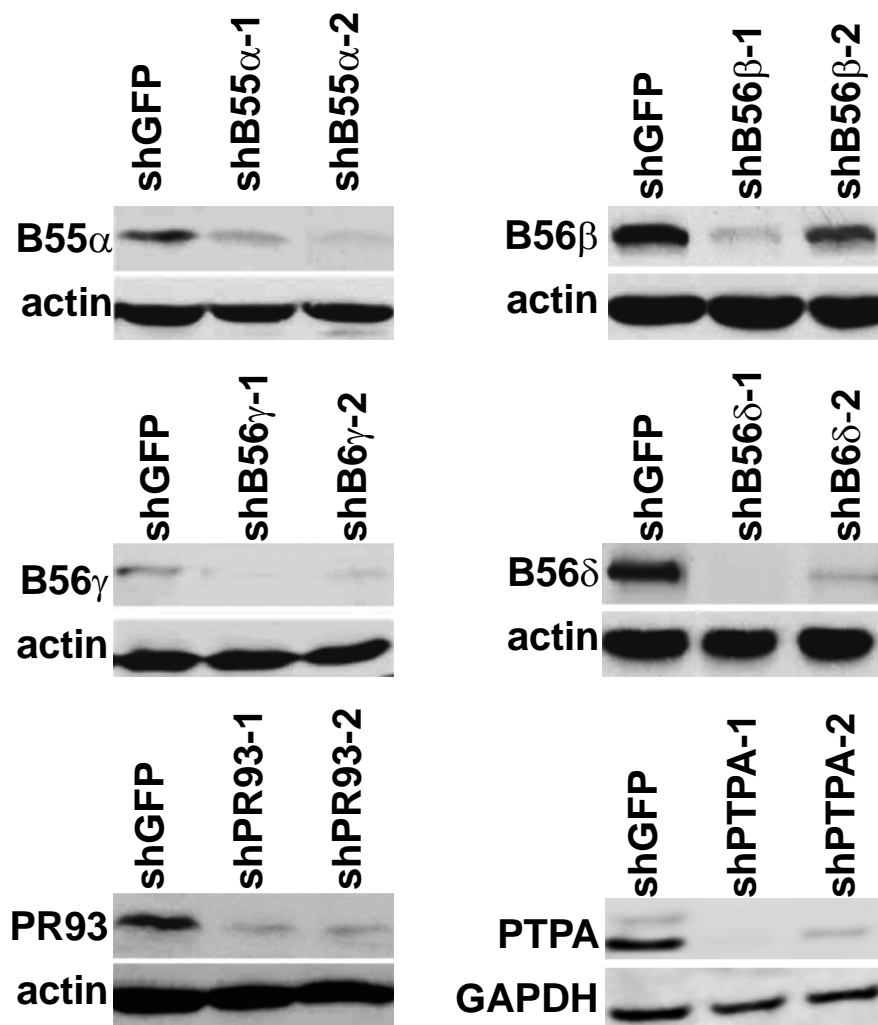

**Supplemental Figure 3. Suppression of PP2A regulatory subunits by specific shRNAs.** Immunoblot analysis of the expression of PP2A B55 $\alpha$ , B56 $\beta$ , B56 $\gamma$ , B56 $\delta$ , PR93, and PTPA after introduction of specific shRNAs.

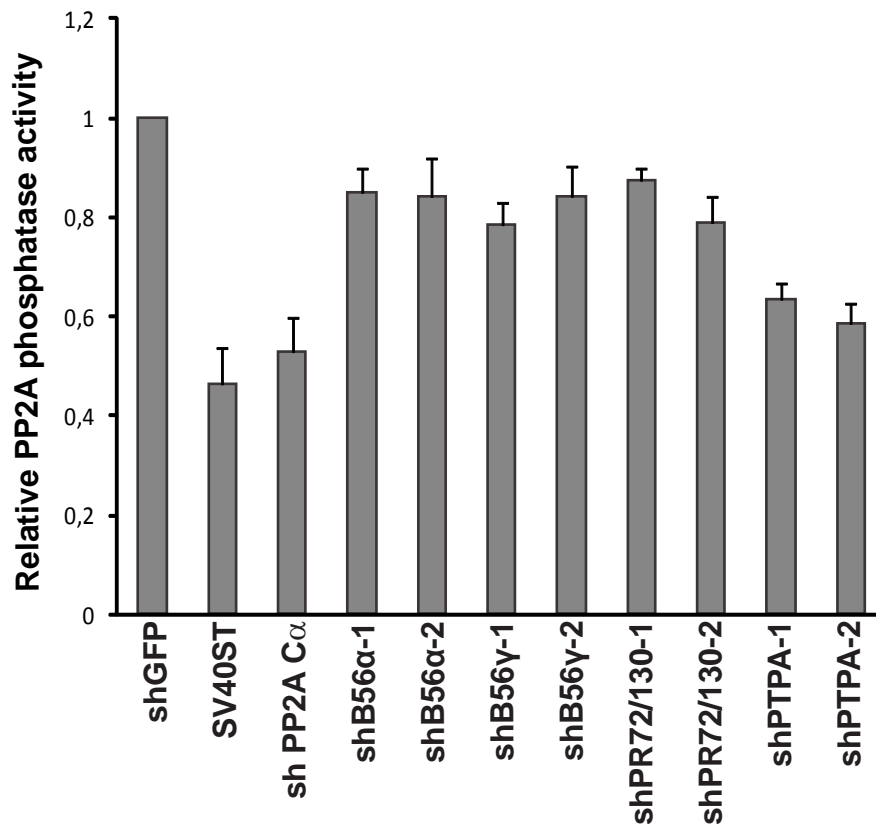

**Supplemental Figure 4. PP2A phosphatase activity after suppression of different PP2A subunits.**

PP2A associated phosphatase activity in HEK TER cells expressing SV40ST or specific shRNAs targeting the indicated PP2A subunits.

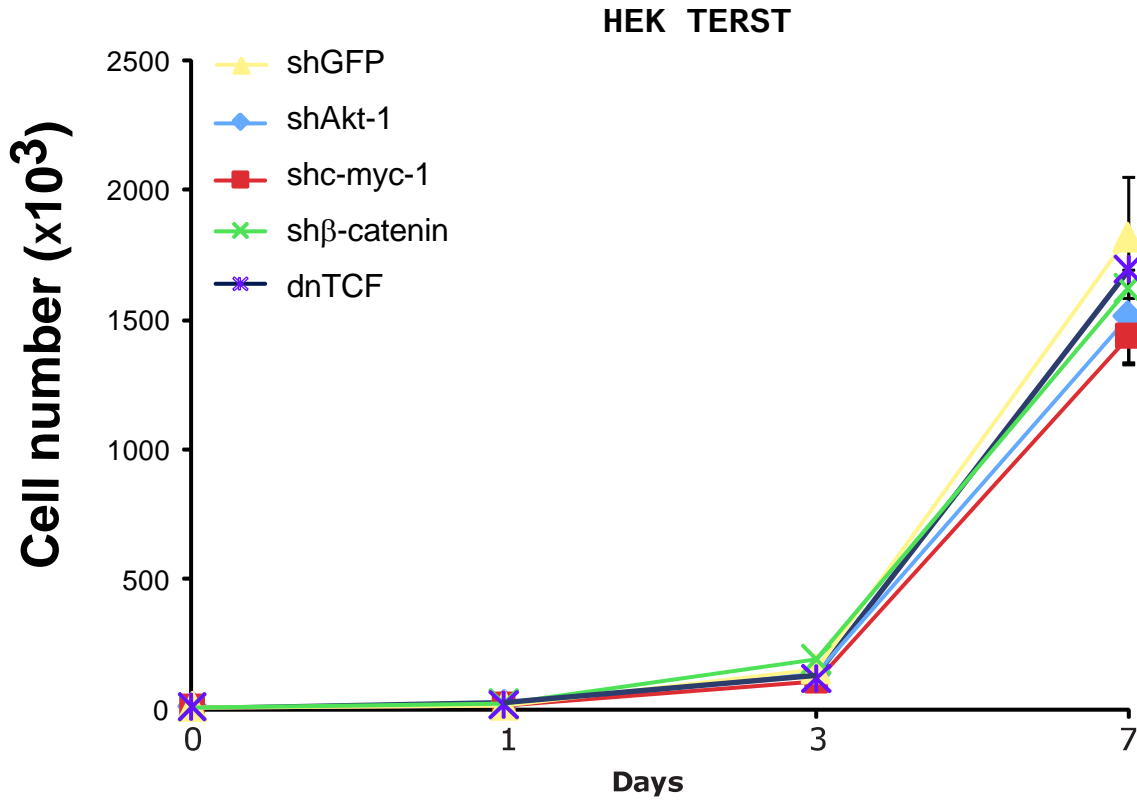

**Supplemental Figure 5. Effect of  $\beta$ -catenin, Akt, or c-myc suppression on cell proliferation.**

Proliferation of HEK TERST cells expressing shGFP, dnTCF or shRNAs targeted  $\beta$ -catenin, Akt-1, and c-myc.

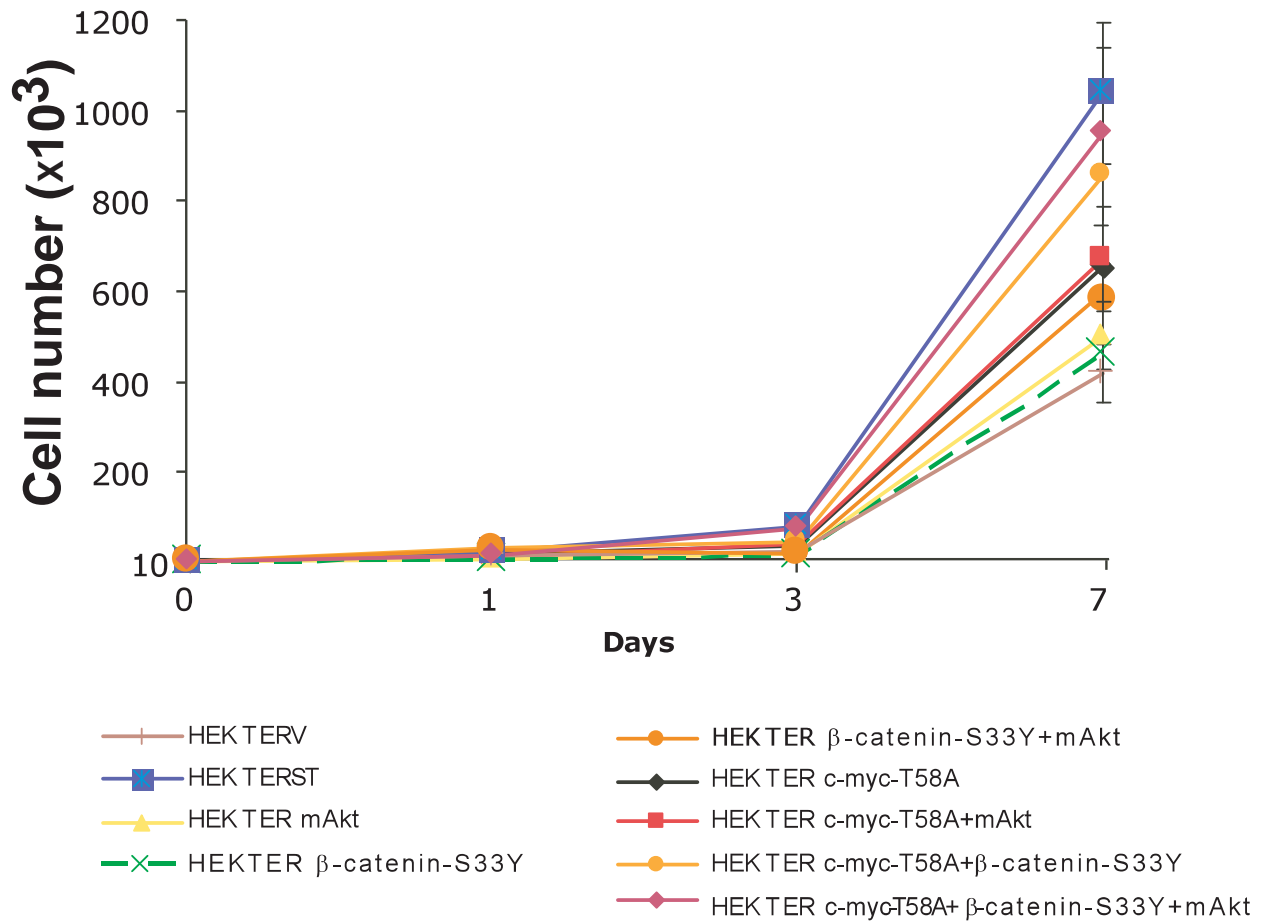

### Supplemental Figure 6. Effect of $\beta$ -catenin, Akt, or c-myc on cell proliferation.

Proliferation of HEK TER cells expressing control vector (v) or pairwise combinations of the indicated genes.

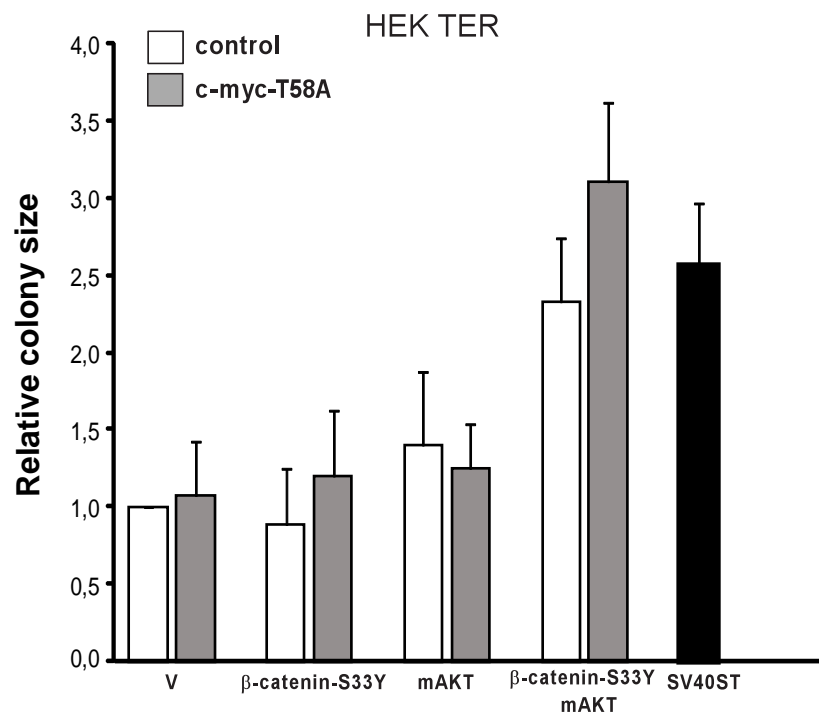

**Supplemental Figure 7. Cooperation between  $\beta$ -catenin, c-myc, and Akt to induce cell transformation.**

Effect of a pairwise expression of c-MycT58A,  $\beta$ -catenin-S33Y, and myr-Akt in HEK TER cells on the size of soft agar colonies.

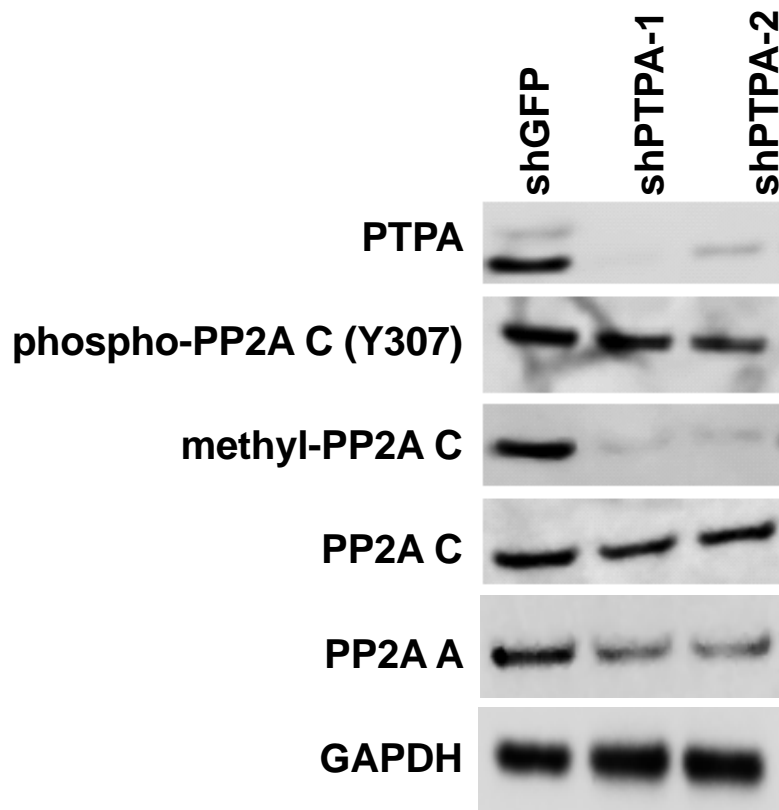

**Supplemental Figure 8. Effects of PTPA suppression on stability and modifications of PP2A subunits.**

Immunoblot analysis of PTPA, PP2A A and C expression as well as levels of methylated PP2A C in HEK TER cells expressing shRNAs targeting PTPA.
